# Supplementary material for: Prediction by Promoter Logic in Bacterial Quorum Sensing
Source: PLOS journal article supplement (doi:10.1371/journal.pcbi.1002361), 2012-01-19
Supplement: S9 (10.1371/journal.pcbi.1002361.s009) [file journal.pcbi.1002361.s009]

**Table S1: List of BioBrick parts.**

| Part             | Description              |
|------------------|--------------------------|
| <i>BBa_R0011</i> | pLac promoter            |
| <i>BBa_R0040</i> | pTet promoter            |
| <i>BBa_R0062</i> | pR promoter              |
| <i>BBa_B0034</i> | Ribosome binding site    |
| <i>BBa_B0015</i> | Transcription terminator |
| <i>BBa_C0161</i> | LuxI                     |
| <i>BBa_C0062</i> | LuxR                     |
| <i>BBa_E0020</i> | CFP                      |
| <i>BBa_E0030</i> | YFP                      |

See the Registry of Standard Biological Parts ([partsregistry.org](http://partsregistry.org)) for details.
